# Supplementary material for: Transcriptome Analysis of Hypothalamic Gene Expression during Daily Torpor in Djungarian Hamsters (Phodopus sungorus)
Source: Front Neurosci. 2017 Mar 13;11:122. doi: 10.3389/fnins.2017.00122 (PMC5346580; doi:10.3389/fnins.2017.00122)
Supplement: Supplementary file 1 [file DataSheet1.XLSX]

## Sheet: Tabelle1
	Normotherm						Torpor entrance
	1		2		3		1		2		3
	Number of sequences	% of sequences mapped	Number of sequences	% of sequences mapped	Number of sequences	% of sequences mapped	Number of sequences	% of sequences mapped	Number of sequences	% of sequences mapped	Number of sequences	% of sequences mapped
Reads mapped in pairs	36185270	46.9	30846564	47.57	38281588	47.76	36654156	47.09	33746626	48.52	51991774	48.64
Total reads	77154388		64840892		80156068		77840156	100	69547936		106889916
