# Supplementary material for: Transcriptome Analysis of Hypothalamic Gene Expression during Daily Torpor in Djungarian Hamsters (Phodopus sungorus)
Source: Front Neurosci. 2017 Mar 13;11:122. doi: 10.3389/fnins.2017.00122 (PMC5346580; doi:10.3389/fnins.2017.00122)
Supplement: Supplementary file 2 [file DataSheet2.XLSX]

## Sheet: up regulated
			Feature ID	Fold change	FDR p-value correction	Normotherm						Torpor
						1		2		3		1		2		3
						Total gene reads	RPKM	Total gene reads	RPKM	Total gene reads	RPKM	Total gene reads	RPKM	Total gene reads	RPKM	Total gene reads	RPKM
			Abca6	2.07408	1.64168e-05	41	0.177781	47	0.230502	57	0.203423	100	0.471097	87	0.260859	171	0.416781
			Abcc10	1.27686	0.0121623	467	3.79945	361	3.32528	420	3.18713	570	4.47745	508	4.51128	793	4.43724
			Adamts10	1.25002	0.0279998	635	8.40321	639	9.68155	685	8.24249	896	11.5054	728	9.76132	1281	11.1632
			Adck3	1.23346	0.0239236	565	10.7644	514	11.8261	674	12.3078	790	15.2248	663	13.8285	1087	14.5082
			Adipor2	1.37027	0.00141466	1430	20.1863	1269	21.094	1392	18.4817	2111	28.9178	1986	29.7407	2361	22.7537
			Agrn	1.27646	0.000314121	2381	16.1163	2010	15.5454	2250	14.5335	2830	19.071	2714	19.5756	4503	20.9954
			Agrp	1.4402	0.0144333	105	4.03439	113	4.73263	128	4.24248	167	6.5218	162	6.92148	259	6.91434
			Akap13	1.31432	0.00297659	528	2.06076	471	2.20571	646	2.42794	779	3.00395	731	3.13225	1001	2.70491
			Ambra1	1.24511	0.000436016	1300	9.81223	1092	9.45152	1351	9.46451	1651	11.8567	1443	11.3727	2397	12.0586
			Ankrd24	1.25803	0.0331316	482	5.76535	431	6.01792	479	5.73488	565	6.72643	556	6.89724	960	7.9146
			Arhgef1	1.3319	0.000861038	719	13.6709	640	14.4214	655	11.9077	911	17.3549	850	17.5255	1422	18.9448
			Asxl2	1.36974	0.00177828	245	2.52882	207	2.55448	257	2.5342	340	3.37486	298	3.28902	507	3.6178
			Atp13a1	1.27073	0.0040363	865	11.9493	792	12.9281	848	10.8777	1168	16.1844	947	14.0369	1657	16.1138
			Atp1a4	1.58267	0.0028128	89	1.53531	74	1.52878	89	1.48498	151	2.55549	137	2.54595	176	2.08739
			Atp2a1	1.89789	0.00409444	39	0.545808	24	0.338968	46	0.606964	59	0.792391	70	1.01558	115	1.01672
			Bai2	1.21002	0.0133811	3841	39.0622	3024	35.5986	3721	35.5322	4199	42.0265	4034	44.8707	6961	49.9457
			Baz2a	1.20608	0.0351673	849	5.2877	706	5.26673	825	4.88776	1083	6.71883	876	5.92721	1411	6.17722
			Brat1	1.26773	0.0238554	325	4.01972	278	3.9873	366	4.23264	416	5.12085	383	5.24513	650	5.38958
			Cacna1b_1	1.30786	1.99065e-05	1091	12.6258	899	12.2045	1226	13.4112	1426	16.2915	1375	17.0623	2131	17.1638
			Cacna1c_1	1.3252	0.0444927	465	4.88428	300	3.69652	467	4.63667	502	5.20547	586	6.60004	810	5.92147
			Cacna1c_2	1.30437	0.0493907	277	6.21604	240	6.31786	314	6.66048	327	7.24419	389	9.36019	556	8.68372
			Cacna1e	1.24956	0.00829652	952	5.94236	694	4.84318	1023	5.95532	1190	6.96579	1076	6.82386	1618	6.72131
			Camkk1	1.28041	0.00633481	613	20.105	584	22.5163	714	22.0499	831	26.2793	859	30.1959	1165	25.962
			Catip	1.62801	0.00232385	74	1.29566	71	0.926773	89	1.19484	116	1.40388	125	1.69426	210	1.80351
			Cercam	1.20142	0.0332689	1163	16.2046	1167	18.2589	1282	15.4516	1517	20.1604	1377	20.424	2239	21.1053
			Cirbp	1.20738	0.00969486	3472	131.763	2969	131.89	3756	135.802	4017	155.104	3884	162.39	6706	179.923
			Clcn7	1.22859	0.00177828	1236	19.4	1138	20.8166	1330	19.3445	1580	24.2778	1469	24.942	2310	24.4493
			Col11a1	1.32557	0.0037611	455	4.28594	450	4.89122	527	4.66534	681	6.28923	551	5.5938	1023	6.71496
			Col17a1	1.77041	0.0273105	740	6.99219	257	3.00298	418	3.83959	755	7.22648	865	8.84724	1288	8.77577
			Col18a1	1.61771	0.00249119	167	1.61478	137	1.60186	190	1.68002	262	2.56772	321	3.33512	331	2.25526
			Col20a1	1.97248	0.0424082	43	0.375465	16	0.136691	23	0.134619	70	0.728543	48	0.388715	69	0.441535
			Col25a1	1.32278	0.0324774	509	11.9279	360	9.54298	426	9.29669	563	12.9115	627	15.3702	799	12.1611
			Col2a1	1.38463	0.0141061	625	7.27284	495	6.90374	493	5.36381	751	8.70872	638	8.13053	1300	10.8047
			Col4a2_1	1.3579	0.00267111	680	9.57075	588	9.70822	636	8.46128	857	11.9077	754	11.3792	1492	14.6152
			Col5a3	1.54547	0.0284481	443	3.95516	421	4.316	309	2.617	561	4.91249	734	6.96309	823	5.09573
			Cpeb4	1.22825	0.00222347	1849	16.9231	1483	15.757	1899	16.4889	2115	18.8361	2111	20.5707	3336	20.8221
			Crebbp_1	1.29141	0.0400694	274	3.78986	212	3.4398	245	3.20317	354	4.83375	293	4.34552	460	4.4282
			Crocc_1	1.26677	0.0356874	485	4.80575	374	4.34727	481	4.50512	542	5.30185	527	5.59927	946	6.52391
			Cspg4	1.30091	0.0133811	381	2.46825	296	2.32271	451	2.75612	505	3.22658	452	3.14103	768	3.4593
			Cyfip2	1.22297	0.00141466	5479	74.0388	4476	70.8901	5996	76.353	6764	90.717	6578	95.4661	9356	87.5551
			Dicer1	1.26817	0.0230427	604	4.98043	449	4.44784	676	5.20146	757	6.11701	655	5.71696	1173	6.48126
			Dip2b	1.28358	0.0147515	581	5.71651	496	5.70943	676	6.163	851	7.88714	634	6.7081	1169	7.27809
			Dnah2	1.67207	0.000420587	234	0.805876	209	0.849811	246	0.867094	388	1.37108	465	1.81555	464	1.18142
			Dnhd1	1.23278	0.0496242	508	1.58655	448	1.67592	496	1.40139	662	2.11748	529	1.86223	925	2.04224
			Dot1l	1.35408	0.00017104	510	3.91869	430	3.80299	514	3.77518	645	4.94912	632	5.13363	1051	5.51864
			Dph7	1.32098	0.0357735	254	3.04025	252	3.58647	262	3.21281	325	3.69269	362	4.57858	506	4.11304
			Dus1l	1.34766	0.00144279	338	8.92242	260	8.18366	345	8.85835	443	11.8232	428	11.8466	613	10.9818
			Eef2k	1.25401	0.0109707	645	8.77908	539	8.68483	649	8.28372	818	10.0858	678	9.74495	1226	11.3381
			Esyt2	1.44101	5.77963e-13	1253	12.0122	1059	12.1805	1345	12.5192	1862	17.8354	1730	18.3035	2571	17.5409
			Fam185a	1.24099	0.0128114	484	8.23738	413	7.83856	508	7.73185	617	10.6057	571	10.6856	855	9.12078
			Fbxl13	1.37147	0.00883099	172	1.03633	143	1.05713	186	1.05057	229	1.39376	225	1.69099	354	1.56797
			Flna	1.23934	0.0458524	1923	11.4356	1994	13.7918	2022	11.3905	2356	13.4824	2583	16.3369	3763	15.5874
			Flnb	1.26425	2.32321e-05	1819	7.95441	1585	8.1223	1876	7.67831	2392	10.0359	2117	9.49845	3337	9.71756
			Frmpd1	1.23866	0.0364143	416	4.92455	362	4.92523	472	5.21529	517	5.87687	531	6.69458	764	6.14741
			Galnt18	1.2883	0.011008	481	9.5194	421	10.0331	564	11.3238	731	13.0988	559	11.3694	922	12.4148
			Gas8	1.39653	0.00710801	226	5.22308	222	5.85271	262	5.52656	305	6.69545	323	8.13608	550	8.69907
			Gcn1l1	1.24109	0.00088541	1556	9.73992	1382	10.1791	1580	9.33597	1937	12.0288	1758	11.709	2939	12.8498
			Gigyf1	1.26466	0.0129559	1349	11.9229	1204	12.3358	1233	10.3301	1597	13.7799	1475	13.8104	2651	16.1261
			Grin2b	1.50674	0.00721528	144	1.51462	93	1.15052	156	1.47862	184	1.85067	203	2.39617	306	2.2811
			Grip2	1.23579	0.0156743	583	7.73122	564	8.50765	661	8.5817	790	9.40036	708	9.44973	1134	9.70021
			Hdac7	1.25241	0.0386737	463	3.71442	369	3.52164	487	3.69138	557	4.47061	491	4.55571	911	5.59529
			Hip1r	1.2602	0.0046903	1955	22.1403	1956	26.3459	2030	21.7618	2801	31.824	2374	28.7195	3634	28.5842
			Hmha1	1.48406	0.0221158	77	0.908566	65	0.904327	76	0.8458	105	1.2367	108	1.43181	168	1.46589
			Hps1	1.37251	0.00822097	335	5.00411	278	4.64723	349	4.84505	450	6.67256	367	5.94329	761	7.71529
			Id2	1.26175	0.00771357	1123	47.2535	906	43.2639	1090	43.0555	1253	49.9635	1394	61.1995	1961	54.8591
			Iffo1	1.43857	0.000336696	1178	16.5034	1178	19.7407	1282	17.6059	1912	26.1488	1398	21.2491	2994	28.5945
			Igsf9b	1.38854	0.0452129	165	1.61544	106	1.18815	146	1.0301	188	1.67072	180	1.8559	316	1.97201
			Iqce	1.33656	0.0040363	333	2.47764	270	2.30621	347	2.4947	428	3.20809	382	3.12834	694	3.5425
			Itpr3	1.45314	0.00914597	280	1.73549	259	1.7634	268	1.4819	339	2.019	446	2.85707	594	2.45165
			Kcna1	1.50141	3.71985e-07	314	10.9576	288	11.3291	333	10.6034	504	16.9413	467	17.1264	672	15.5628
			Kcnh3	1.60417	0.00266806	98	1.33694	72	1.10931	97	1.12503	152	1.94757	157	2.20278	187	1.55459
			Kcnt1	1.25812	0.00112627	849	9.37476	720	9.06885	883	9.23937	1030	10.7315	1004	11.9102	1601	12.1835
			Kcp	1.3887	0.0421615	100	0.929498	88	0.930803	106	0.900027	136	1.19737	132	1.21545	213	1.2386
			Kdm4b	1.20752	0.0331316	658	5.56247	517	5.37039	675	5.46566	763	6.59524	721	6.78429	1140	6.85805
			Kiaa0195	1.29021	0.000107002	846	8.39481	701	8.09538	906	8.3428	1068	10.1775	1036	10.8175	1614	10.8945
			Kiaa1244	1.26822	0.003116	703	5.54154	534	4.89787	685	5.04556	828	6.25815	809	6.69725	1219	6.47919
			Kif21b	1.21164	0.0037611	1385	8.26013	1146	8.03539	1394	7.89707	1616	9.56534	1569	10.0722	2401	9.89844
			Klhdc4	1.23977	0.0429441	552	11.2727	553	12.8174	599	10.8318	713	12.3387	661	12.6589	1136	14.0219
			Klhl17	1.2874	0.00492536	1455	17.5379	1586	21.5708	1645	18.6539	2160	24.5189	1863	24.3329	3147	25.4971
			Klk8	1.86505	0.0326251	27	1.83531	28	2.31857	35	2.33532	54	3.4843	40	2.72484	109	5.01111
			Kmt2d	1.25563	0.00224382	1511	4.18118	1362	4.42475	1769	4.65555	2043	5.6053	1732	5.11547	3133	5.99332
			Leng8	1.32427	0.00344485	1158	29.8163	931	29.9926	939	24.2386	1361	35.0027	1255	34.8737	2153	38.6246
			Leprel2	1.3153	0.00191447	779	15.8404	725	17.3226	792	15.5669	1098	21.8153	865	18.6695	1634	22.2314
			Zfp451	1.24303	0.0449266	559	6.72906	491	6.44197	714	8.18832	719	8.15483	717	8.99013	1140	9.50655
			Tubg2	1.54445	0.00088541	397	14.5032	357	15.2421	398	13.7841	754	26.4387	450	17.6816	904	22.0408
			OR2K2	2.66053	0.00249119	11	0.528068	13	0.75712	14	0.720995	24	1.2164	36	1.7616	61	2.24599
			Egfem1	1.4807	0.00195791	130	1.15561	119	1.66547	130	0.998699	188	1.46678	182	1.45154	292	1.81538
			LOC100766933	1.73475	0.0364143	40	1.89117	36	1.93223	25	1.21096	60	3.07149	46	2.74739	89	3.09949
			Naip1	1.41499	0.0215159	115	0.952104	99	0.978716	131	1.10408	160	1.36628	151	1.36822	266	1.56439
			LOC100771914	1.44222	0.00115238	190	4.405	179	4.86822	208	4.55824	285	6.52297	251	6.23975	450	7.26109
			Sfi1	1.32354	0.00969486	382	7.37721	374	8.47277	381	6.95497	559	10.6573	446	9.23559	778	10.457
			Col5a1	1.53871	0.00426818	88	2.1474	80	2.29005	85	1.96061	134	3.22807	120	3.13988	206	3.4986
			Col5a2	1.30988	0.0238554	272	5.17691	222	4.95655	270	4.85744	315	5.91862	334	6.81631	532	7.0471
			Cdk11b	1.49397	4.55865e-07	514	10.0251	551	12.5297	662	12.0728	900	17.284	812	16.8827	1336	18.1637
			LOC100773668	1.3425	0.00134704	412	3.13994	324	2.87914	426	2.90319	541	4.22327	466	3.55797	837	4.37067
			LOC100773864	1.67051	0.00013549	124	5.07074	142	6.49362	193	6.94995	285	11.1381	230	9.51505	387	10.4404
			LOC100774011_1	1.51278	0.0198537	66	2.08213	55	2.03541	81	2.41541	107	3.33239	105	3.55185	145	3.18368
			LOC100774093	1.28054	0.0221937	314	13.6202	258	13.0328	322	13.0941	421	17.209	380	17.944	534	15.9823
			LOC103160902_1	1.94245	0.0332734	21	0.359459	23	0.461831	22	0.355955	60	1.01389	39	0.715807	50	0.595658
			LOC103164493	2.02809	0.0386427	19	0.553688	18	0.61131	10	0.307864	36	1.06106	28	0.908011	49	1.04273
			LOC103164540	1.54312	0.00676696	98	7.36948	91	7.66256	112	7.91582	136	10.4995	158	13.2	256	12.706
			Lrrc16b	1.25477	0.000534691	1714	18.8594	1429	17.9178	1724	17.5795	2126	23.2512	1853	21.6638	3255	24.848
			Mamdc4	1.22592	0.04366	895	6.71313	801	7.23814	852	5.68432	1092	7.56517	922	7.09749	1711	8.39981
			Man2b1	1.28132	0.00908544	423	5.71402	383	6.07652	421	5.48525	580	8.01327	499	6.85224	767	7.0493
			Man2c1	1.25096	0.000861038	1410	19.281	1233	19.6579	1450	18.745	1891	24.3518	1547	21.8017	2597	23.7313
			Mapkbp1	1.31161	0.000489098	579	4.01857	537	4.38928	599	3.95553	805	5.51342	715	5.23352	1128	5.29639
			Mau2	1.27723	0.0111098	434	11.2299	368	10.708	441	10.2295	523	11.8294	501	12.6132	855	14.5181
			Mbd6	1.34484	0.00914597	807	9.98272	750	10.8514	719	8.34308	939	11.3136	1016	13.542	1707	14.5751
			Med12	1.26744	0.00451277	1063	7.24072	953	7.7107	1116	7.3626	1495	9.96497	1133	8.25826	2074	9.70265
			Megf8	1.27238	0.0037611	1097	7.86268	785	6.62087	1050	7.1558	1222	8.47985	1239	9.49175	1916	9.4265
			Mical2_1	1.20226	0.0331316	1058	10.9754	825	10.0395	1056	10.3548	1184	12.1253	1220	13.5705	1720	12.4182
			Micalcl	1.769	0.0382901	22	0.297156	21	0.348586	26	0.421326	43	0.708942	37	0.63726	64	0.585976
			Mpv17l2	1.27475	0.0260727	356	20.6354	270	18.2914	334	18.941	426	25.0222	414	26.68	590	24.4752
			Myo15a	1.92633	0.0351673	38	0.206126	47	0.269435	33	0.13917	69	0.360466	57	0.309429	155	0.573838
			Myof	1.51433	0.00883099	201	1.39607	149	1.17401	184	1.21628	236	1.54427	247	1.87571	487	2.24765
			Nav2	1.3355	0.00676696	339	2.05392	295	2.0239	341	1.85732	414	2.31152	462	2.93646	652	2.63979
			Ncapd2	1.30655	0.00428237	521	5.84726	424	5.51292	518	5.43571	730	7.90732	553	6.52889	968	7.48332
			Ncor2	1.2327	0.00253261	2215	11.7723	1797	11.2517	2438	12.248	2843	14.9276	2368	13.7582	4167	15.4856
			Nfasc	1.22437	0.0230201	920	9.58302	724	8.13828	1041	9.49203	1099	10.6063	1123	12.0122	1609	10.8686
			Nktr	1.25494	0.00088541	1577	8.15516	1374	8.49722	1563	7.63095	1930	9.6156	1761	9.0703	3029	10.6486
			Nrbp2	1.25654	0.00969486	1879	57.758	1618	57.5234	1646	48.3046	2160	65.629	2096	69.8563	3414	73.7418
			Pan2	1.2474	0.00232385	1249	13.7263	1113	13.9836	1244	12.5133	1520	16.0561	1421	16.5105	2391	17.9431
			Pelp1	1.26106	0.0151318	470	7.88158	430	8.30703	568	9.22739	650	10.9602	561	10.1671	974	11.3746
			Per1	1.27605	0.0151318	583	8.26014	406	6.61431	568	7.33255	678	9.55492	622	9.41542	1036	9.98559
			Pfas	1.28553	1.52367e-05	1400	17.4033	1165	16.7479	1474	17.4107	1852	22.9161	1702	22.8093	2513	21.4958
			Pkd1	1.21638	0.00249119	2811	10.5182	2563	11.1881	2980	10.5336	3568	12.9338	3110	12.1612	5367	13.5932
			Plec	1.20732	0.00122378	2772	9.6847	2265	9.32539	2956	9.78336	3430	11.8459	3062	11.4702	4819	11.6929
			Plekhg5	1.33807	0.0188713	675	9.3529	513	8.18165	540	7.00638	736	9.93907	839	12.4851	1131	10.734
			Pole	1.31468	0.00342046	358	2.59207	330	2.78111	374	2.50988	518	3.72134	428	3.31322	697	3.42656
			Ppp1r12c	1.21807	0.00682635	880	23.1871	715	22.5178	878	21.8597	1051	27.1918	955	26.3655	1538	28.3948
			Prodh	1.20068	0.0245429	861	20.8246	774	21.2824	908	19.3139	1119	25.0804	930	22.5557	1549	24.7292
			Ptpn23	1.28511	0.000808296	1146	11.7752	870	10.5593	1150	11.3548	1452	14.6186	1207	13.1585	2143	15.2338
			Ptprd	1.20064	0.0292127	2503	24.687	2053	23.1735	2338	21.6848	2707	25.9863	2661	27.4267	4451	30.2167
			Pxn	1.33908	0.00266806	345	4.12405	292	3.95978	366	4.14793	511	5.723	395	4.81549	673	5.52602
			Ralb	1.24975	0.010319	508	8.69076	408	8.18493	544	8.89942	654	11.0558	567	10.4742	921	11.0645
			Rapgef3	1.24711	0.0428675	1778	12.2478	2002	15.918	2128	13.8662	2512	16.6213	2282	15.6591	4011	17.934
			Rasa4b	1.38736	0.00301853	336	6.56663	225	4.98118	293	5.30779	422	8.33809	391	8.48423	569	7.83241
			Rbm3	1.27638	1.48958e-05	2255	85.6541	1782	78.8119	2270	81.2691	2830	114.826	2515	114.668	4126	121.252
			Rbm33	1.26923	0.00128172	1490	12.5774	1307	12.8245	1620	12.8431	1810	15.1319	1775	15.8663	3072	17.9132
			Rexo1	1.23309	0.0351673	529	5.64859	418	5.21546	494	4.93739	600	6.24789	565	6.2782	932	6.83117
			Rgs11	1.23588	0.0101374	1873	32.0954	1731	35.7171	1785	29.8928	2394	40.1548	2033	37.3037	3480	40.1971
			Rimkla	1.25787	0.0271255	358	8.96531	340	10.4644	398	9.3218	468	10.311	470	11.8723	679	9.35952
			Ripk1	1.46876	0.0238554	121	1.26969	112	1.33429	156	1.43769	213	2.06296	149	1.50326	317	2.18158
			Sbno2	1.26756	0.0184378	438	4.15776	385	4.2942	474	4.14367	552	5.09726	499	5.06395	899	5.85035
			Scn8a	1.22124	0.031056	1405	6.58201	1095	6.04845	1339	5.9604	1598	7.30638	1662	8.33797	2184	6.97101
			Sez6l	1.31802	0.00183931	1569	22.8363	1250	21.2032	1511	20.7258	1766	25.0291	2065	32.2097	2845	28.6528
			Sfxn3	1.26809	0.00766592	706	26.9929	529	23.8056	643	23.4897	863	32.5693	775	31.3659	1144	30.5247
			Sgk1	1.33185	0.000274343	1108	24.7976	871	22.9768	1059	22.4062	1473	32.6328	1163	28.2108	2160	33.0278
			Sh3gl1	1.23335	0.0350291	577	12.7507	542	14.9894	570	12.6435	722	16.5598	694	16.9662	1035	15.9888
			Slc1a1	1.21724	0.0452129	754	21.4829	563	18.0237	690	18.7469	816	23.3458	797	24.141	1262	24.4489
			Slc45a4	1.25691	0.00365963	639	5.34325	539	5.28579	665	5.14856	776	6.24636	772	6.84933	1173	6.66259
			Slc8b1	1.40515	0.0184772	147	1.87987	116	1.66694	152	1.8189	218	2.92255	200	2.8093	259	2.18402
			Slc9a5	1.22459	0.0333383	770	8.43556	789	9.39719	835	8.36083	1059	10.9338	912	10.249	1496	10.8233
			Snapc4	1.31563	0.0130855	378	4.1964	309	3.9062	354	3.56877	511	5.54806	390	4.44655	720	5.41045
			Snrnp70	1.20561	0.0133811	5371	92.5145	4953	98.3621	5562	90.2224	6393	106.955	5990	108.491	10434	117.737
			Speg_1	1.24907	0.00173713	1235	6.81712	1014	6.56594	1239	6.46468	1437	7.83068	1399	8.28043	2313	8.88601
			Srrm2	1.23518	8.67053e-05	13598	74.4772	11328	72.7534	13772	71.1211	16068	86.5711	15508	91.3295	24787	94.6247
			Steap3	1.68851	0.0132305	39	0.859371	29	0.716285	42	0.769558	65	1.38419	61	1.35796	92	1.36935
			Syne4	1.38638	0.0325998	181	3.13369	127	3.09002	215	4.42167	244	4.7525	218	4.67499	392	4.96254
			Syt7	1.31385	0.0331316	1199	22.857	789	18.0321	1121	20.6577	1221	22.1687	1506	29.8117	2019	24.3039
			Szt2	1.31492	0.000545325	996	4.68408	929	5.16531	1038	4.59349	1262	5.87674	1240	6.22174	2135	6.91098
			Tanc2	1.20131	0.00514525	1466	8.45797	1290	8.64252	1613	8.88507	1800	10.2461	1740	10.7966	2614	10.4535
			Tet3	1.33071	0.0294433	223	1.29827	163	1.10111	204	1.11195	284	1.6066	234	1.49013	407	1.66291
			Thbs3	1.38271	0.0037611	658	8.5219	405	6.01434	624	7.13838	779	9.16526	715	9.65775	1252	10.6687
			Tmem179	1.31665	0.0223873	486	35.9813	403	33.8963	528	35.7971	585	40.8065	554	42.0428	1093	53.7012
			Tmem52	1.54115	0.00246959	160	12.9783	156	14.0533	170	12.4392	217	16.6649	269	22.9665	400	20.5919
			Tnrc6c	1.27325	0.0368337	673	5.13648	543	4.826	707	5.08173	780	5.8515	721	5.87598	1428	7.55564
			Tox2	1.29176	0.00539186	786	22.0535	627	20.8736	750	19.6444	885	24.586	992	28.5092	1396	27.0397
			Trpm4	1.37729	0.00384253	384	4.94596	344	5.12508	392	4.67512	521	6.68657	439	6.08415	887	7.71647
			Tubgcp5	1.24904	0.0320955	738	11.4417	620	11.227	677	9.86039	810	12.2271	828	13.6534	1380	14.7624
			Tyk2	1.26592	0.0187538	1314	13.0952	1221	14.2141	1497	14.0383	1846	18.0088	1403	14.8997	2852	19.8141
			Ube2o	1.23345	0.000651801	2325	26.8601	1863	25.3171	2461	27.1848	2757	31.6441	2696	33.5196	4168	33.4552
			Unc13b	1.28963	0.00134956	780	5.28191	591	4.39978	834	5.24002	982	5.97019	871	5.69478	1496	6.48209
			Unc45a	1.21674	0.0327071	831	12.087	749	12.4782	944	12.8571	1036	14.5697	925	14.0085	1687	16.1104
			Unc80	1.26668	0.00124726	2757	12.7984	2080	11.2069	2463	10.6799	3309	14.9003	3030	15.1196	4463	13.948
			Vwf	1.5891	0.0461704	87	0.533895	70	0.504093	57	0.301564	101	0.623479	111	0.726067	195	0.847384
			Zbtb17	1.2491	0.0496735	340	5.40162	315	5.99513	363	5.50122	427	6.89457	442	7.68361	621	6.67076
			Zdhhc1	1.22389	0.0141061	1709	26.6417	1678	31.5535	1901	27.0616	2225	31.5547	1972	31.2827	3509	34.719
			Zfr2	1.26393	0.00214125	1552	24.6507	1496	27.6292	1669	25.0034	1955	30.144	1926	32.1893	3200	34.48
			Znf318	1.25505	0.00141466	720	5.00978	619	5.01362	791	5.08674	953	6.49398	859	6.36009	1321	6.30608
			Znf512b	1.23873	0.0221158	1217	10.7358	1055	11.0681	1251	10.6067	1478	12.9463	1272	11.9592	2466	15.1128

## Sheet: down regulated
Feature ID	Fold change	FDR p-value correction	Normotherm						Torpor entrance
			1		2		3		1		2		3
			Total gene reads	RPKM	Total gene reads	RPKM	Total gene reads	RPKM	Total gene reads	RPKM	Total gene reads	RPKM	Total gene reads	RPKM
Anln	-1.33677	0.00675494	1436	15.8795	1333	17.2645	1878	19.5943	1133	12.2786	1285	15.2417	1598	12.2574
Anxa5	-1.34198	8.67053e-05	2996	100.776	2780	110.34	3774	119.68	2361	77.939	2198	79.2162	3877	90.6958
Btg1	-1.24349	0.0215253	516	21.4504	445	21.4495	556	21.6931	427	17.1875	372	16.3013	640	18.2917
Bud31	-1.23288	0.0221158	658	38.0729	556	36.8409	673	36.3414	559	31.988	455	26.9934	791	31.2251
Calcr	-1.28348	0.0327071	798	10.0664	681	10.1984	888	10.6855	680	8.44966	487	6.45034	1031	8.87931
Capza1	-1.2107	0.00430488	2170	41.535	1835	41.1288	2376	42.62	1957	36.5088	1615	32.8564	2606	34.5099
Cbx1	-1.24183	0.0260422	639	19.7141	482	17.4018	657	18.8806	521	15.3833	446	14.6157	709	14.8527
Ccng2	-1.42079	0.0155933	511	10.8887	484	12.0069	496	9.9425	443	9.2875	340	7.68252	431	6.48705
Cd38	-1.38176	0.0360163	231	11.9356	175	10.9139	199	9.7199	138	7.19061	155	9.31966	221	7.83836
Cd55	-1.43048	0.0458706	306	3.96033	274	4.22005	231	2.80387	197	2.47664	163	2.3855	321	2.74533
Cdh19	-1.25375	0.0269248	465	10.5142	427	11.4369	553	11.768	390	8.51605	378	9.01917	586	9.14708
Cdk2ap2	-1.27978	0.0300003	307	16.5071	280	18.4938	352	18.642	251	14.2208	236	13.9214	376	14.4146
Cenpq	-1.28276	0.0104519	783	14.649	714	15.326	830	14.5493	713	13.1294	522	10.1711	901	11.3116
Chchd1	-1.22148	0.0131843	863	53.5522	748	55.6854	867	52.5569	733	46.2098	645	44.2362	1005	44.8175
Chordc1	-1.2364	0.0060884	1805	40.678	1544	40.9497	1967	41.7228	1549	34.153	1474	35.2652	1964	29.9843
Clk1	-1.92873	0	2680	51.4062	2171	47.9919	3106	54.8581	1501	30.0273	1271	28.9082	2053	27.9924
Clk4	-1.43672	1.42129e-10	2274	38.6836	2058	41.0466	2769	45.2921	1737	28.3454	1570	28.3787	2492	27.7155
Coq10b	-1.39217	0.000492365	952	27.9861	782	26.4641	794	21.9582	673	19.2013	587	17.979	870	17.3985
Coq3	-1.51368	0.0302051	314	11.5645	306	13.0833	429	14.4713	319	11.1322	194	7.32541	285	6.87433
Cornifin-A	-4.03614	0.000289545	20	1.3681	24	1.92585	18	1.0992	3	0.202589	4	0.293392	11	0.523693
Crnkl1	-1.30028	0.00872087	683	15.0045	521	13.1738	662	13.5262	559	12.2523	427	9.9065	693	10.2494
Crot	-1.2608	0.000612107	1300	25.4583	1188	27.2273	1488	27.357	1108	21.5137	972	20.3921	1641	22.2574
Dcun1d5	-1.32635	0.000554533	852	34.3769	677	30.4299	776	29.8114	627	29.8896	541	31.2812	877	32.157
Enpp6	-1.46304	0.003116	207	4.476	185	4.8967	256	5.37181	140	2.95411	151	3.50522	229	3.78026
Flrt3	-1.2378	0.0131843	1023	11.5115	812	10.5254	1134	12.043	882	9.75371	707	8.49989	1230	9.57893
Foxo4	-1.25477	0.0361867	385	8.23569	326	8.05527	441	9.03619	321	6.77897	283	6.66523	476	7.24684
Gmnn	-1.36239	0.00800691	257	9.72865	223	9.86651	268	9.56227	184	6.77268	188	7.7718	272	7.14861
Gtf2f2	-1.23007	0.048336	483	8.95613	418	9.37605	527	10.3544	402	8.45408	349	8.72335	621	8.76635
Idh1	-1.25965	0.00134704	1413	36.2733	1312	39.5985	1588	38.2441	1253	32.2258	1021	28.2973	1770	31.5154
Iqcb1	-1.29591	2.32321e-05	2745	48.4607	2290	46.8913	2670	44.726	2116	36.8778	1793	33.243	3130	36.7874
Kiaa1551	-1.29512	0.0444927	342	3.30022	324	3.65959	449	4.09612	324	3.16888	265	2.78579	418	2.86238
Klf6_1	-1.24104	0.0368337	557	11.7999	429	10.6612	578	11.5743	468	9.78765	382	8.67739	627	9.24461
Klhl24	-1.26342	0.0370681	581	12.0078	449	10.9011	524	10.0984	469	9.71868	383	8.63889	587	8.49545
Klhl9	-1.24588	0.000436016	1610	22.1718	1435	23.1803	1795	23.3543	1403	19.0723	1221	18.0263	1937	18.5577
Lcat	-1.26428	0.0198832	594	13.6901	459	12.6365	608	13.1013	483	11.1145	383	9.49077	681	10.8143
Zfp11	-1.23224	0.0111098	977	3.99769	806	3.70903	1143	4.40857	828	3.26487	771	3.29287	1177	3.35143
LOC100752799	-1.22563	0.026449	724	12.21	566	10.975	750	11.8412	588	9.58393	544	9.61619	814	9.2337
LOC100753290	-1.51129	0.0130855	371	15.7399	312	14.8422	328	12.9896	204	7.41067	277	10.8404	292	8.72158
LOC100754037	-2.99077	0.0370681	23	4.13593	25	5.51335	13	2.31013	2	0.371184	11	1.81424	11	1.43926
LOC102642077	-1.55174	0.0139974	135	1.70351	98	1.44418	149	1.90792	91	1.11644	62	0.920982	138	1.25535
LOC100756005	-1.60837	0.0236456	94	1.0799	64	0.806144	114	1.11356	55	0.460354	49	0.605284	95	0.597854
Samd9l	-1.36103	0.0350291	240	2.39712	212	2.42798	287	2.81485	218	2.23093	151	1.67582	268	1.89619
Nipsnap3b	-1.4806	0.0292127	103	3.42211	88	3.3142	120	3.94936	69	2.3177	73	2.43205	104	2.54789
LOC105245212	-1.25209	0.0085371	1525	180.865	1429	198.998	1765	196.85	1471	170.147	1138	144.988	1802	148.289
LOC105244651	-1.3291	0.0486924	264	29.2416	278	36.1216	310	32.4565	247	27.0087	182	21.6158	329	25.3624
LOC100767713	-1.28746	0.0233415	454	7.21348	450	8.32943	495	7.36761	399	6.1972	314	5.26033	576	6.30083
LOC100768314	-1.68787	0.00249119	147	2.24895	104	1.86871	189	2.77535	98	1.43387	72	1.17224	135	1.34783
LOC102632383	-1.56237	0.00554512	132	2.48212	98	2.04049	132	2.32772	80	1.42777	63	1.25739	131	1.65949
LOC100772405	-1.27572	0.0325998	522	9.69171	465	9.65658	596	10.1767	431	7.62616	446	8.73977	563	7.14036
LOC100772408_1	-1.46887	0.000289545	416	27.9718	395	31.1565	551	35.0203	344	22.8346	306	22.0622	428	20.0294
LOC100772408_2	-1.4717	2.4343e-05	619	42.5533	627	50.5632	829	53.869	514	34.883	455	33.5394	679	32.487
LOC100774181	-1.36321	0.00183931	435	8.59597	371	8.60012	519	9.69427	322	6.2816	334	7.07707	480	6.60152
LOC102638674	-1.62329	0.00249119	114	2.48997	113	2.77667	118	2.41173	81	1.72978	70	1.84586	98	1.43344
LOC103159055	-2.87342	0.00430488	17	2.67695	32	5.91107	41	6.10263	8	1.24363	10	1.68847	19	2.08229
LOC102636379	-1.43004	1.02653e-07	776	29.2644	627	26.168	787	28.5492	533	20.3866	499	20.7813	764	21.0208
Lrif1	-1.30102	0.00969486	379	5.99346	311	5.8853	427	6.33362	301	4.75337	269	4.69356	438	4.83921
Map1lc3b	-1.20969	0.00934543	1944	57.7655	1714	59.5202	2190	60.8129	1655	47.5371	1659	51.8937	2325	47.1265
Mex3c	-1.28235	0.003116	816	14.6311	683	14.2637	911	15.4105	684	12.1652	630	12.1999	871	10.8281
Mkks	-1.31975	8.34659e-06	1181	21.2596	1025	21.2105	1258	21.2468	926	16.4594	875	17	1269	15.7103
Mrps36	-1.24722	0.00393698	898	77.4529	815	81.2882	968	78.1501	718	60.8077	720	65.8502	1090	64.942
Nkrf	-1.25599	0.00073469	1462	15.9189	1185	15.1557	1500	15.4833	1183	12.8086	1093	12.7813	1576	11.9279
Nudt2	-1.2541	0.0332689	426	17.9269	393	19.0244	469	18.3953	355	14.3225	308	13.3946	553	15.8629
Nup35	-1.30471	0.00825814	600	20.2885	539	21.5985	648	20.4493	544	18.0715	402	14.6549	660	15.4511
Pdcl	-1.20937	0.0452129	769	14.4474	638	13.9936	877	15.5713	695	12.7858	591	11.9383	922	11.9396
Pdik1l	-1.2724	0.0325998	428	5.27682	322	4.60095	468	5.42688	325	3.89743	308	4.02572	489	4.17541
Phf6	-1.27365	0.0221937	728	9.13714	555	8.29023	734	8.72402	621	7.77069	477	6.4892	749	6.5428
Pipox	-1.45972	0.0248282	149	5.0889	119	3.81394	127	3.78583	98	2.65145	77	2.6778	145	2.39398
Polk_2	-1.41953	0.00612273	245	4.75638	207	4.71418	221	4.0555	176	3.37312	153	3.18496	227	3.06714
Prosc	-1.24972	0.00244896	860	19.9943	738	20.3618	923	20.3993	704	15.8342	630	15.1828	1042	16.5832
Psmc3ip	-1.70851	0.0104519	137	4.75791	121	4.93022	113	3.9352	55	1.87882	85	3.01853	117	2.95268
Ranbp6	-1.26095	0.00013549	2519	30.3056	2141	30.3545	2771	31.5769	2087	24.8891	1969	25.226	2812	23.6269
Rbm15	-1.34614	0.0496242	334	1.3144	283	1.37345	450	1.5974	284	1.11222	220	0.971172	432	1.36835
Rdh11	-1.22683	0.0491555	861	25.0351	764	25.921	1007	27.7748	830	23.9606	683	21.4249	980	19.7962
Rgs2	-1.2836	0.00577682	915	32.203	743	30.4797	996	32.9258	794	27.4048	668	24.8876	936	22.6848
Rnd3	-1.28111	0.0128114	905	17.0877	746	16.4443	899	15.9672	799	15.0934	586	11.9495	943	12.3826
Rpa3	-1.26064	0.0228221	447	26.2359	407	28.7146	450	25.7838	357	20.9516	331	21.7794	532	22.3375
Rpe	-1.22765	0.0209777	1003	19.7643	827	19.1819	973	18.298	778	15.2603	794	16.9018	1095	14.9855
Rrp15	-1.60515	0.000977568	693	29.8985	690	34.805	1055	43.9043	642	27.7108	466	20.7845	634	18.0725
Rwdd4	-1.34986	0.0210988	376	6.52962	295	6.01538	318	5.21606	233	3.90619	241	4.37592	393	4.69268
S100b	-1.27085	0.00878796	2824	431.552	2611	467.23	3605	519.788	2505	377.324	2052	334.329	3889	411.843
Sat1	-1.20715	0.0240993	861	41.2391	811	44.4812	936	44.347	752	38.4909	701	37.6724	1090	38.5422
Scg3	-1.21338	0.000651801	4066	154.689	3475	155.362	4526	163.67	3515	132.094	3131	127.445	5035	133.659
Sec62	-1.23844	0.00224382	9841	240.013	8588	246.206	10695	247.791	8531	204.94	8009	208.827	10711	180.115
Sike1	-1.3643	0.00246959	621	15.2403	555	15.7608	665	15.2587	551	13.3626	390	10.1597	639	10.7116
Slc47a1	-1.87125	0.0347673	57	1.58287	100	3.2968	108	3.05344	51	1.37128	35	1.14305	85	1.61874
Smim11	-1.46909	0.0193377	113	13.6156	108	15.9721	128	14.3991	90	9.71507	72	9.54025	117	8.91323
Spry3	-1.37625	0.0357607	170	5.01041	161	5.54697	203	5.68325	152	4.32803	119	3.82789	183	3.81407
Srsf3	-1.29335	2.90511e-05	1593	75.8465	1447	78.467	1812	76.0404	1375	66.7514	1180	62.9855	1843	60.8743
Stk31	-2.6868	0.00141466	46	0.898717	64	1.45588	54	1.03154	21	0.401362	30	0.550664	19	0.268067
Swt1	-1.56212	0.000373763	294	4.35344	246	4.2464	350	4.73305	234	3.27447	158	2.46226	274	2.70805
Taf13	-1.28069	0.00191447	907	36.8746	785	37.371	1055	40.4461	774	31.0472	636	27.73	1118	31.6258
Thrsp	-1.36806	0.0278647	278	16.3217	239	16.318	340	18.4667	193	11.4133	229	14.5843	309	12.6935
Tmeff2	-1.34779	5.25053e-06	1223	48.3095	977	43.9259	1251	48.2065	952	36.1851	772	33.3649	1282	35.678
Tob1	-1.24559	0.0327436	459	12.082	422	13.0187	545	13.6166	407	10.4703	357	9.96546	582	10.5586
Top2a	-2.08473	0.00249119	222	2.19647	92	1.07749	250	2.34043	91	0.88706	78	0.824317	145	1.0006
Tpgs2	-1.25088	0.0269248	1213	42.6428	1118	45.6587	1498	49.8436	1130	39.1661	1047	38.9347	1361	32.5917
Wdr89	-1.44267	0.0327071	114	2.64758	112	2.99586	125	2.67977	92	2.08172	74	1.78373	120	1.89158
Zdhhc6	-1.29158	0.00344485	757	17.6506	714	19.2736	789	17.0994	635	14.4845	587	14.6331	825	13.3379
Znf24	-1.21154	0.0230881	933	15.0415	787	15.1127	969	14.7158	812	13.1712	731	12.7387	1047	11.687
Znf326	-1.22706	0.0104964	1259	16.4394	1147	16.9261	1303	15.8559	1135	15.0616	906	13.7806	1523	14.8301
Znf667	-1.31083	0.0347673	274	4.15688	243	4.38869	313	4.51136	236	3.58694	179	2.92199	332	3.50388
Znf770	-1.25861	0.0209777	650	7.92723	498	7.11033	734	8.46148	536	6.4533	477	6.23775	732	6.20473
